# Supplementary material
Source: Springer Nature journal article supplement (https://www.springermedizin.de/resource/supplementary/12889_2012_4872_MOESM2_ESM.pdf/9493084)

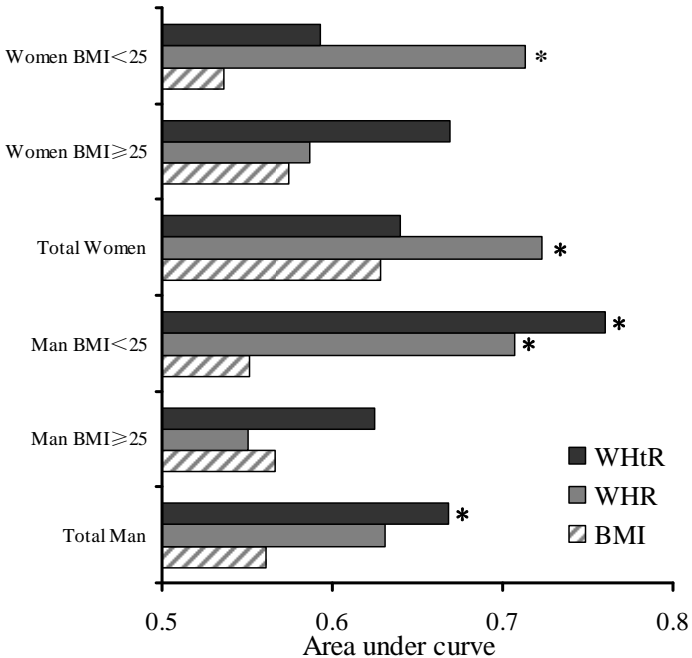

Supplement: MOESM2 [file 9493084]
